# Supplementary material for: In situ characterization of Cu–Co oxides for catalytic application
Source: Royal Society of Chemistry journal article supplement (doi:10.1039/c4fd00192c), 2014-10-29
Supplement: c4fd00192c1.pdf [file c4fd00192c1.pdf]

Electronic Supplementary Material (ESI) for Faraday Discussions  
This journal is © The Royal Society of Chemistry 2014

## Electronic Supplementary Information (ESI)

### In-situ characterization of Co-Cu oxides for catalytic application

Zhen-Yu Tian,<sup>a,b,\*</sup> Henning Vieker,<sup>c</sup> Patrick Mountapmbeme Kouotou,<sup>b</sup> and André Beyer<sup>c</sup>

<sup>a</sup> Institute of Engineering Thermophysics, Chinese Academy of Sciences, 11 Beisihuanxi Road, Beijing 100190, China

<sup>b</sup> Department of Chemistry, Bielefeld University, Universitätsstraße 25, D-33615 Bielefeld, Germany

<sup>c</sup> Department of Physics, Bielefeld University, Universitätsstraße 25, D-33615, Bielefeld, Germany

\* Corresponding author. Tel/Fax: +86-10 8254 3184; E-mail: [tianzhenyu@iet.cn](mailto:tianzhenyu@iet.cn).

#### Section 1: Surface components

**Table ESI 1** The curve fitting results of Co 2p<sub>3/2</sub> and its satellite of Co-Cu oxide films

| Item                 | Name | Co <sub>3</sub> O <sub>4</sub> |      |        | CuCo <sub>2</sub> O <sub>4</sub> |      |        |
|----------------------|------|--------------------------------|------|--------|----------------------------------|------|--------|
|                      |      | Position                       | FWHM | % Area | Position                         | FWHM | % Area |
| Co 2p <sub>3/2</sub> | I    | 779.8                          | 1.49 | 44.66  | 779.5                            | 1.58 | 44.66  |
|                      | II   | 781.1                          | 1.74 | 31.25  | 780.9                            | 1.70 | 31.25  |
|                      | III  | 782.4                          | 2.30 | 15.18  | 782.2                            | 2.15 | 15.18  |
| Satellites           | IV   | 785.1                          | 4.40 | 3.57   | 785.2                            | 4.60 | 3.57   |
|                      | V    | 789.9                          | 3.01 | 5.35   | 789.7                            | 3.41 | 5.35   |

**Table ESI 2** The curve fitting results of Cu 2p<sub>3/2</sub> and its satellite of Co-Cu oxide films

| Item                 | Name | CuCo <sub>2</sub> O <sub>4</sub> |           |        | CuO      |      |        |
|----------------------|------|----------------------------------|-----------|--------|----------|------|--------|
|                      |      | Position                         | FWHM      | % Area | Position | FWHM | % Area |
| Cu 2p <sub>3/2</sub> | i    | 933.7                            | 2.20      | 29.83  | 933.7    | 2.20 | 29.54  |
|                      | ii   | 935.0                            | 3.00      | 31.75  | 935.1    | 3.00 | 31.43  |
| Satellites           | iii  | 941.1                            | 1.30      | 2.88   | 941.1    | 1.36 | 2.85   |
|                      | iv   | 942.2                            | 3.861.997 | 26.90  | 942.3    | 3.92 | 26.63  |
|                      | v    | 944.3                            | 1.40      | 5.76   | 944.3    | 1.36 | 5.70   |
| Cu <sup>1+</sup>     |      | 932.4                            | 1.09      | 2.88   | 932.4    | 0.95 | 3.84   |

**Table ESI 3** The curve fitting results of O 1s of Co-Cu oxide films

| Item             | Co <sub>3</sub> O <sub>4</sub> |       |        | CuCo <sub>2</sub> O <sub>4</sub> |       |        | CuO      |       |        |
|------------------|--------------------------------|-------|--------|----------------------------------|-------|--------|----------|-------|--------|
|                  | Position                       | FWHM  | % Area | Position                         | FWHM  | % Area | Position | FWHM  | % Area |
| O <sub>Lat</sub> | 530.12                         | 1.177 | 56.35  | 529.77                           | 1.200 | 30.24  | 529.81   | 1.095 | 22.77  |
| O <sub>Ad</sub>  | 531.54                         | 1.741 | 40.10  | 531.96                           | 1.932 | 69.76  | 532.07   | 2.476 | 77.23  |
| O <sub>Sub</sub> | 533.24                         | 1.705 | 3.55   | -                                | -     | -      | -        | -     | -      |

Note: O<sub>Lat</sub>, O<sub>Ad</sub> and O<sub>Sub</sub> refer to lattice, adsorbed and sublattice oxygen, respectively.

Tables ESI 1-3 show the curve fitting results of Co 2p<sub>3/2</sub>, Cu 2p<sub>3/2</sub> and O 1s as well as their corresponding satellites of the prepared Co-Cu oxides. As shown in Fig. 4 in the main text, CuCo<sub>2</sub>O<sub>4</sub> exhibits quite similar Co 2p and Cu 2p shapes to those measured for Co<sub>3</sub>O<sub>4</sub> and CuO, respectively. For O 1s, a significant difference is observed in terms of components. From Co<sub>3</sub>O<sub>4</sub> to CuO, the amount of lattice oxygen decreases and adsorbed oxygen increases. Moreover, a small quantity of sublattice oxygen was observed in the prepared Co<sub>3</sub>O<sub>4</sub> films, while such component was not measured in CuCo<sub>2</sub>O<sub>4</sub> and CuO samples. All fits were done according to high quality reference data published by Biesinger et al.<sup>1,2</sup>

## Section 2: Comparison of the catalytic performance

**Table ESI 4** Overview of the catalytic performance of CO and propene oxidation with Co-Cu oxides and some catalysts in the literature

| Material                                   | Weight (mg) | Gas composition                                            | WHSV <sup>a</sup> (ml g <sup>-1</sup> h <sup>-1</sup> ) | T <sub>50</sub> <sup>b</sup> (°C) | Ref.         |
|--------------------------------------------|-------------|------------------------------------------------------------|---------------------------------------------------------|-----------------------------------|--------------|
| CuCo <sub>2</sub> O <sub>4</sub>           | 12          | 1% CO/10% O <sub>2</sub> in Ar                             | 75000                                                   | 190                               | This work    |
| Co <sub>3</sub> O <sub>4</sub> thin film   | 12          | 1% CO/ 10% O <sub>2</sub> /89% Ar                          | 75000                                                   | 335                               | <sup>3</sup> |
| Pt/Al <sub>2</sub> O <sub>3</sub>          | 2/200       | 1% CO/1.38% O <sub>2</sub> in N <sub>2</sub>               | 90000                                                   | 333                               | <sup>4</sup> |
| α-Fe <sub>2</sub> O <sub>3</sub> thin film | 20          | 1% CO/10% O <sub>2</sub> / 89% Ar                          | 45000                                                   | 320                               | <sup>5</sup> |
| Bare mesh                                  | -           | 1% CO/10% O <sub>2</sub> in Ar                             | -                                                       | 684                               | This work    |
|                                            |             |                                                            |                                                         |                                   |              |
| CuCo <sub>2</sub> O <sub>4</sub>           | 12          | 1% C <sub>3</sub> H <sub>6</sub> /10% O <sub>2</sub> in Ar | 75000                                                   | 330                               | This work    |
| CuO                                        | 12          | 1% C <sub>3</sub> H <sub>6</sub> /10% O <sub>2</sub> in Ar | 75000                                                   | 272                               | <sup>6</sup> |

|                                                                       |     |                                                                          |        |     |                        |
|-----------------------------------------------------------------------|-----|--------------------------------------------------------------------------|--------|-----|------------------------|
| Co <sub>3</sub> O <sub>4</sub>                                        | 12  | 1% C <sub>3</sub> H <sub>6</sub> /10% O <sub>2</sub> in Ar               | 75000  | 347 | <sup>3</sup>           |
| Co <sub>3</sub> O <sub>4</sub>                                        | 12  | 2% C <sub>3</sub> H <sub>6</sub> / 20% O <sub>2</sub> in Ar              | 75000  | 354 | <sup>7</sup>           |
| Cu <sub>0.72</sub> Co <sub>2.28</sub> O <sub>4</sub>                  | 40  | 13% C <sub>3</sub> H <sub>6</sub> / 52% O <sub>2</sub> in N <sub>2</sub> | 15000  | 275 | <sup>8</sup>           |
| Co <sub>2.66</sub> Mn <sub>0.34</sub> O <sub>4</sub>                  | 12  | 2% C <sub>3</sub> H <sub>6</sub> / 20% O <sub>2</sub> in Ar              | 75000  | 321 | <sup>7</sup>           |
| α-Fe <sub>2</sub> O <sub>3</sub> at 400 °C                            | 20  | 1% C <sub>3</sub> H <sub>6</sub> /10% O <sub>2</sub> in Ar               | 45000  | 355 | <sup>9</sup>           |
| Au/Al <sub>2</sub> O <sub>3</sub>                                     | 200 | 1.5% C <sub>3</sub> H <sub>6</sub> / 4% O <sub>2</sub> in He             | 22500  | 349 | <sup>10</sup>          |
| Au/Li <sub>2</sub> O/Al <sub>2</sub> O <sub>3</sub>                   | 200 | 1% C <sub>3</sub> H <sub>6</sub> / 9% O <sub>2</sub> in He               | 225000 | 327 | <sup>11</sup>          |
| Au/MgO/Al <sub>2</sub> O <sub>3</sub>                                 | 200 | 1% C <sub>3</sub> H <sub>6</sub> / 9% O <sub>2</sub> in He               | 214286 | 359 | <sup>11</sup>          |
| La <sub>1.7</sub> Sr <sub>0.3</sub> CuO <sub>4</sub> S <sub>0.2</sub> | 200 | 0.1% C <sub>3</sub> H <sub>6</sub> / 5% O <sub>2</sub> in N <sub>2</sub> | 30000  | 419 | <sup>12</sup>          |
| Bare mesh                                                             | -   | 1% C <sub>3</sub> H <sub>6</sub> /10% O <sub>2</sub> in Ar               | -      | 529 | This work <sup>a</sup> |

Note:

WHSV is weight hourly space velocity; <sup>b</sup> T<sub>50</sub> refers to the temperatures at which 50% propene is converted.

Table ESI 4 compares the catalytic performance of the deposited Co-Cu oxides with that of the selected catalysts in the literature. Special attention is paid to the comparison of the catalytic performance with noble metals and transition metal oxides. As can be seen from the table, both noble metals and transition metal oxides present attractive results in terms of CO and propene oxidation. For CO oxidation, Co-Cu oxides exhibit lower T<sub>50</sub> than Pt/Al<sub>2</sub>O<sub>3</sub> and other Co-based oxides. Although Co-Cu oxides are slightly less active than CuO, their performances are comparable with the active Au/Li<sub>2</sub>O/Al<sub>2</sub>O<sub>3</sub> and Co<sub>3</sub>O<sub>4</sub>. Moreover, Co-Cu oxides own better thermal stability than CuO and Co<sub>3</sub>O<sub>4</sub>, demonstrating that Co-Cu binary oxides have more potential to be applied in the real catalytic oxidation processes.

### Section 3: Experimental conditions

**Table ESI 5** Experimental conditions for the preparation of Co-Cu oxides

|                            |                                               |
|----------------------------|-----------------------------------------------|
| Precursors                 | Co(acac) <sub>3</sub> , Cu(acac) <sub>2</sub> |
| Solvent                    | Ethanol                                       |
| Concentration of precursor | 5 mM                                          |
| Frequency                  | 4 Hz                                          |
| Opening time               | 2.5 ms                                        |
| Evaporation temperature    | 220 °C                                        |

|                            |                                                  |
|----------------------------|--------------------------------------------------|
| Transportation temperature | 220 °C                                           |
| Substrate temperature      | 400 °C                                           |
| Deposition pressure (mbar) | 30                                               |
| N <sub>2</sub> (SLM)       | 0.5                                              |
| O <sub>2</sub> (SLM)       | 1.0                                              |
| Substrates                 | Silicon, planar and bare mesh of stainless steel |

#### ***Section 4: High resolution helium ion micrographs (HIM)***

Additional micrographs of the CuCo<sub>2</sub>O<sub>4</sub> films:

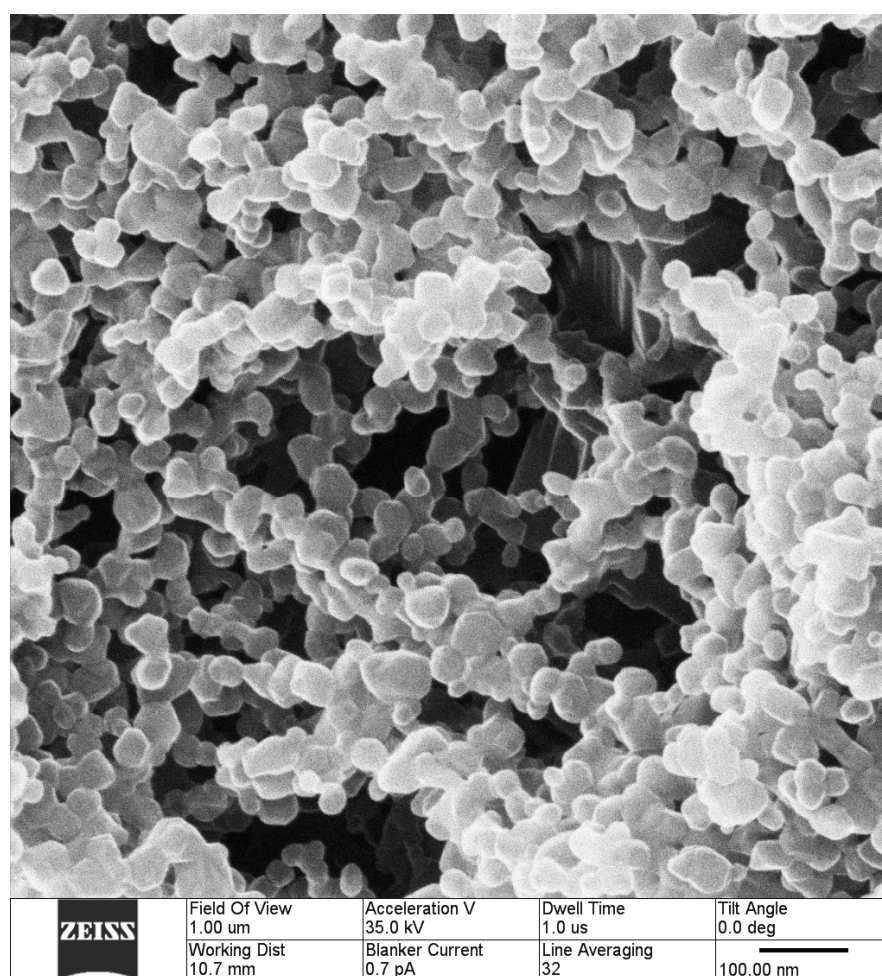

**Fig. ESI 1** HIM images of CuCo<sub>2</sub>O<sub>4</sub> films on stainless steel mesh used for catalytic test.

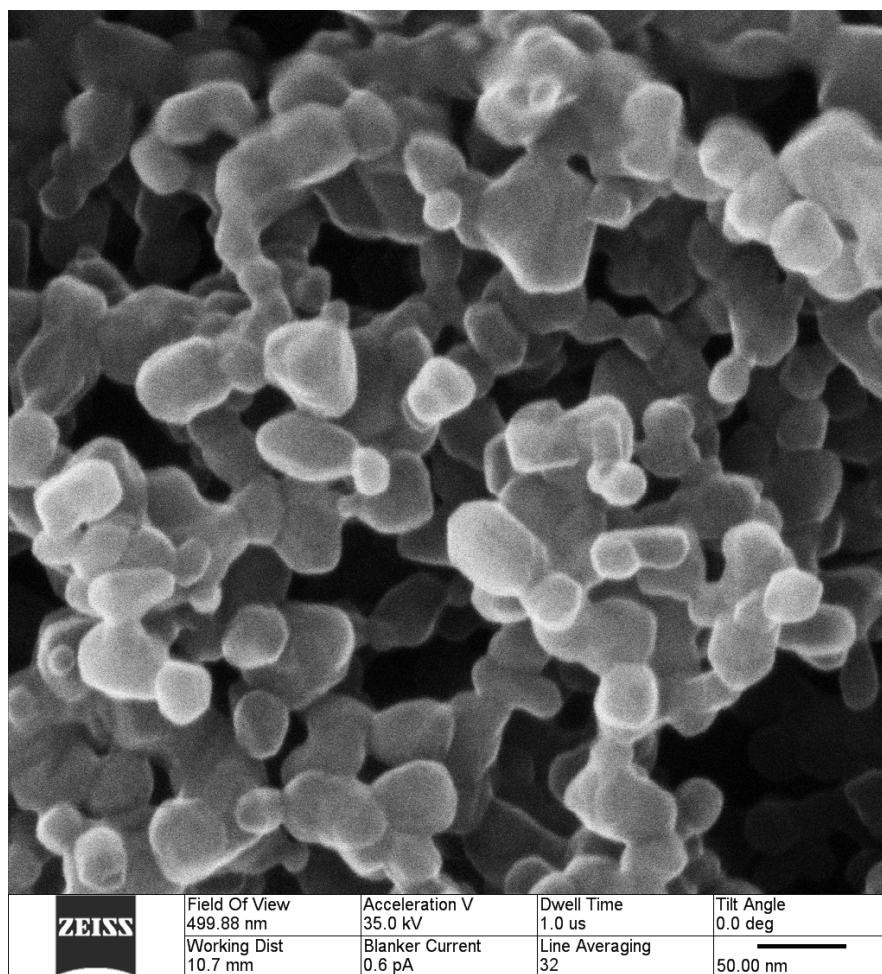

**Fig. ESI 2** HIM images of  $\text{CuCo}_2\text{O}_4$  films on stainless steel mesh used for catalytic test.

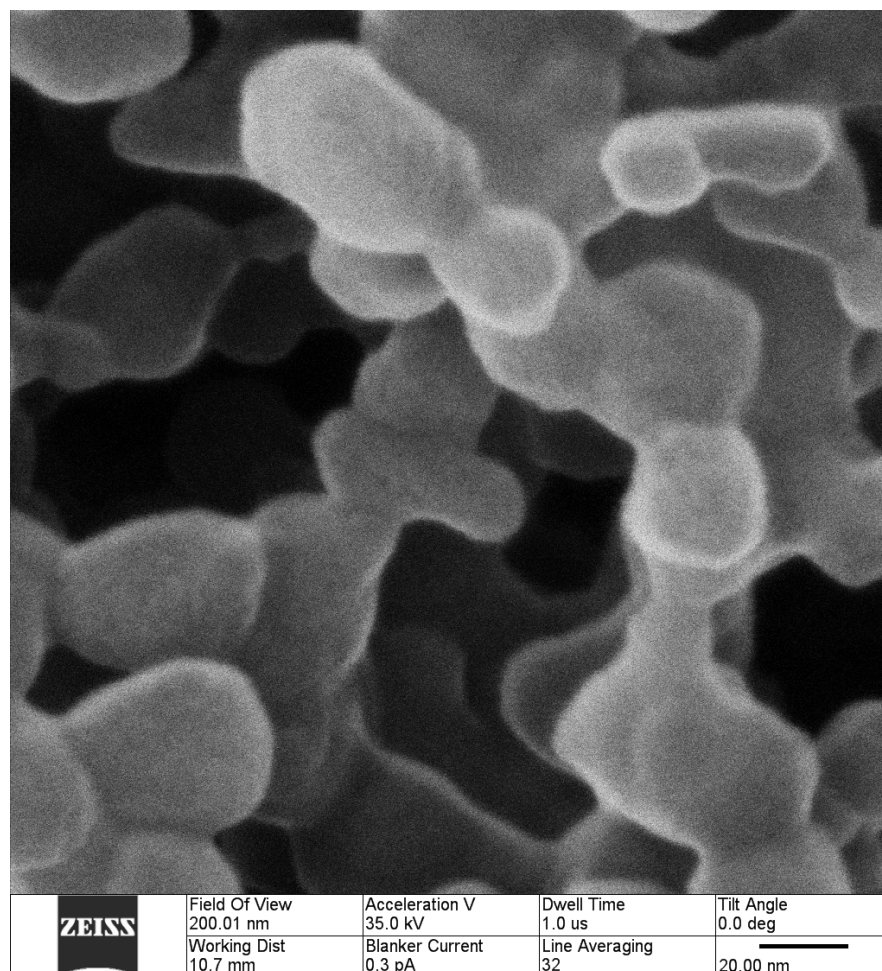

**Fig. ESI 3** HIM images of  $\text{CuCo}_2\text{O}_4$  films on stainless steel mesh used for catalytic test.

## References (ESI)

1. M.C. Biesinger, L.W.M. Lau, A.R. Gerson, R.S.C. Smart, *Appl. Surf. Sci.*, 2010, **257**, 887-898.
2. M.C. Biesinger, B.P. Payne, A.P. Grosvenor, L.W.M. Lau, A.R. Gerson, R.S.C. Smart, *Appl. Surf. Sci.*, 2011, **257**, 2717-2730.
3. P.M. Kouotou, Z.Y. Tian, U. Mundloch, N. Bahlawane, K. Kohse-Höinghaus, *RSC Adv.*, 2012, **2**, 10809-10812.
4. V.A. Törnroona, M. Skoglundh, P. Thormählen, E. Fridell, E. Jobson, *Appl. Catal. B: Environ.*, 1997, **14**, 131-145.
5. P.M. Kouotou, Z.Y. Tian, H. Vieker, K. Kohse-Höinghaus, *Surf. Coat. Technol.*, 2013, **230**, 59-65.
6. Z.Y. Tian, H.J. Herrenbrück, P.M. Kouotou et al., *Surf. Coat. Technol.*, 2013, **230**, 33-38.

7. Z.Y. Tian, P.H.T. Ngamou, V. Vannier, K. Kohse-Höinghaus, N. Bahlawane, *Appl. Catal. B: Environ.*, 2012, **117-118**, 125-134.
8. H. Baussart, R. Delobel, M.L. Bras, J.M. Leroy, *J. Chem. Soc., Faraday Trans. I*, 1979, **75**, 1337-1345.
9. P.M. Kouotou, Z.Y. Tian, H. Vieker, A. Beyer, A. Götzhäuser, K. Kohse-Höinghaus, *J. Mater. Chem. A*, 2013, **1**, 10495-10504.
10. S. Ivanova, C. Petit, V. Pitchon, *Gold Bull.*, 2006, **39**, 3-8.
11. A.C. Gluhoi, N. Bogdanchikova, B.E. Nieuwenhuys, *J. Catal.*, 2005, **232**, 96-101.
12. M. Machida, K. Ochiai, K. Ito, K. Ikeue, *J. Catal.*, 2006, **238**, 58-66.
